# Supplementary material
Source: Royal Society of Chemistry journal article supplement (doi:10.1039/d5py01210d)
Supplement: d5py01210d1.pdf [file d5py01210d1.pdf]

## Degrafting reaction of polymer brushes: the determining role of molecular weight and grafting density

Riccardo Chiarcos<sup>a</sup>, Diego Antonioli<sup>a</sup>, Luca Gabutti<sup>a</sup>, Elo Marsengo<sup>a</sup>, Michele Perego<sup>b</sup> and Michele Laus<sup>a</sup>

<sup>a</sup>Department of Science and Technological Innovation (DISIT), Università del Piemonte Orientale (UPO), Alessandria 15121, Italy

<sup>b</sup>Institute for Microelectronics and Microsystems (IMM), National Research Council of Italy (CNR), Agrate Brianza 20864, Italy

riccardo.chiarcos@uniupo.it

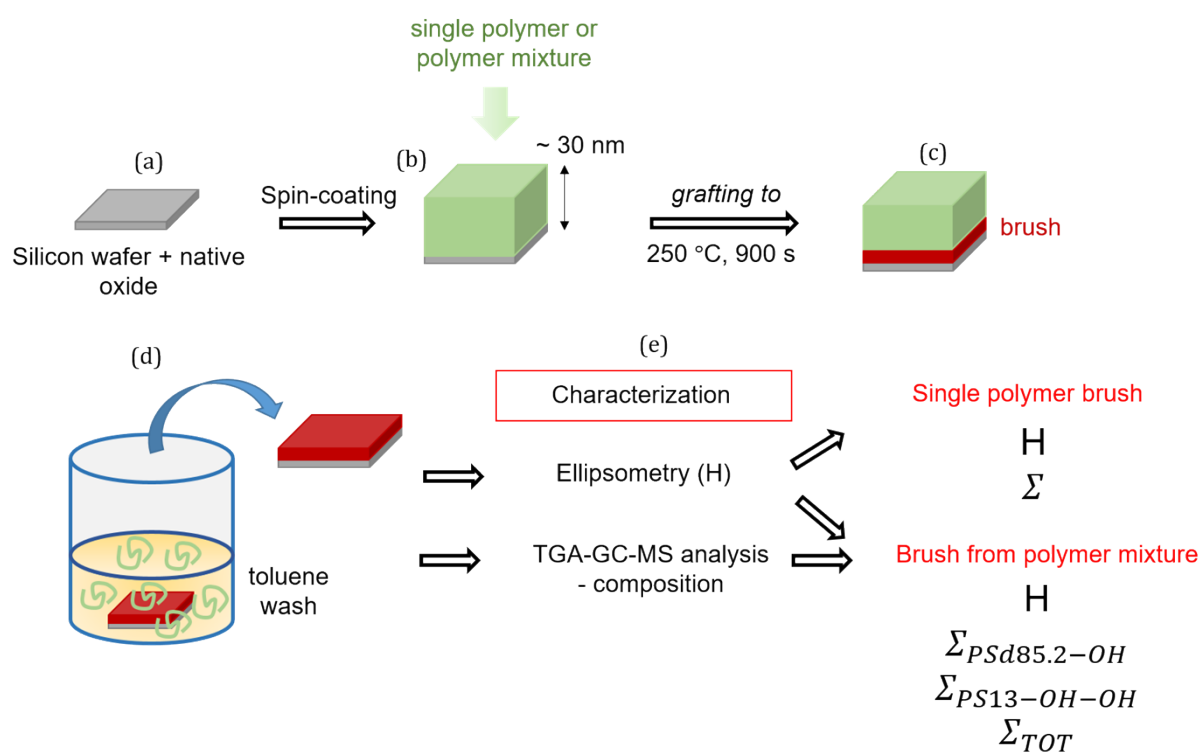

Figure S1. Workflow of the grafting to process.

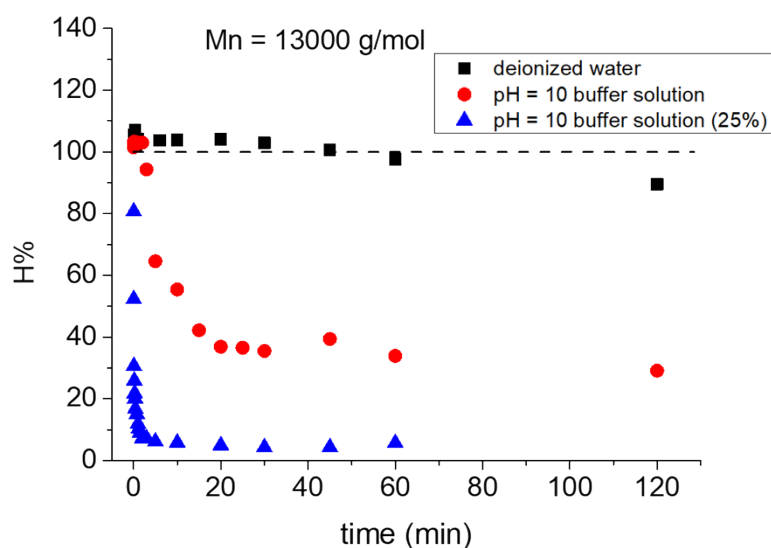

**Figure S2.** Residual percentage (H%) of the brush thickness after exposure to deionized water (black dots), pH = 10 buffer solution (red dots) and pH = 10 buffer solution (25%) / THF (75%) mixture. These three different conditions were tested on polymer brushes obtained with PS13-OH.

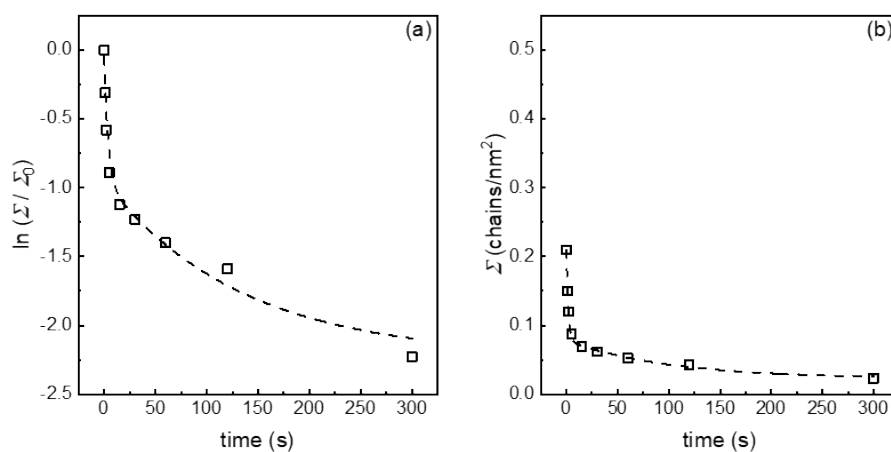

**Figure S3.**  $\ln(\Sigma/\Sigma_0)$  vs degrafting time (a) and  $\Sigma$  vs degrafting time (b) for the polymer brush consisting of PS43.2-OH. The experimental data are reported as black dots, while the data fitting was performed with the software Origin using a double factor exponential decay function.

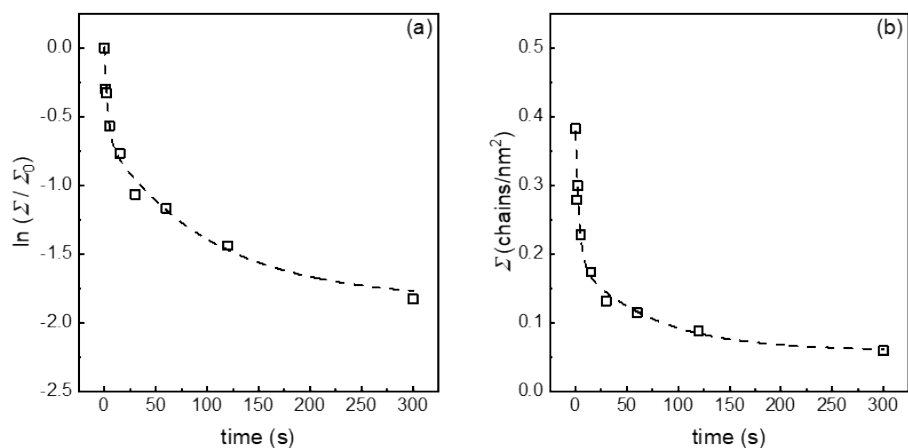

**Figure S4.**  $\ln(\Sigma/\Sigma_0)$  vs degrafting time **(a)** and  $\Sigma$  vs degrafting time **(b)** for the polymer brush consisting of PS<sub>13</sub>-OH. The experimental data are reported as black dots, while the data fitting was performed with the software Origin using a double factor exponential decay function.

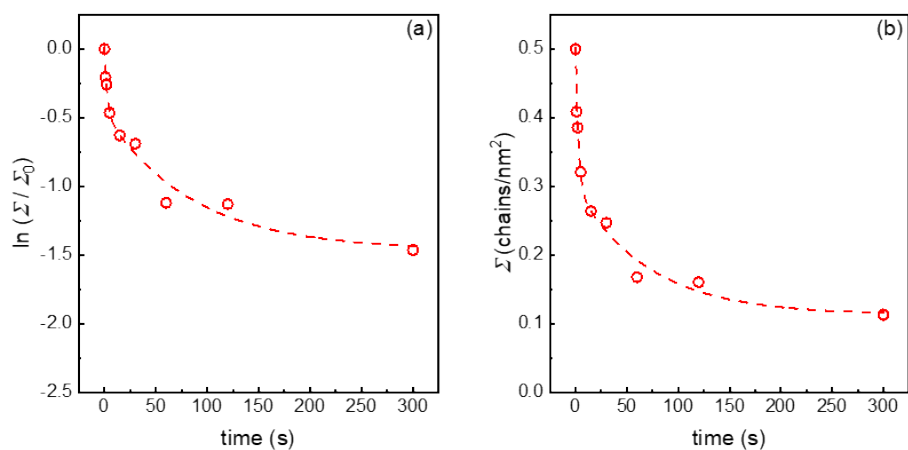

**Figure S5.**  $\ln(\Sigma/\Sigma_0)$  vs degrafting time **(a)** and  $\Sigma$  vs degrafting time **(b)** for the polymer brush consisting of PS<sub>85.2</sub>-OH. The experimental data are reported as red dots, while the data fitting was performed with the software Origin using a double factor exponential decay function.

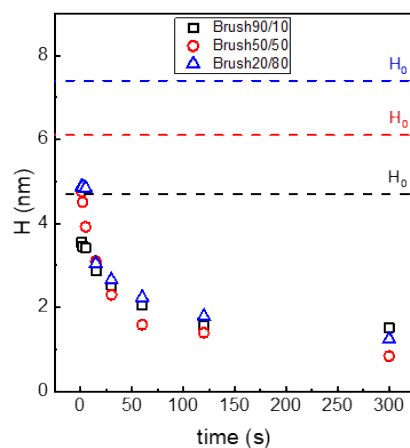

**Figure S6.** H values as a function of the degrafting time for the brushes Brush90 (black dots), Brush50 (red dots) and Brush20 (blue dots). The values of  $H_0$ , relative to the brushes before degrafting, are also included as dotted lines.

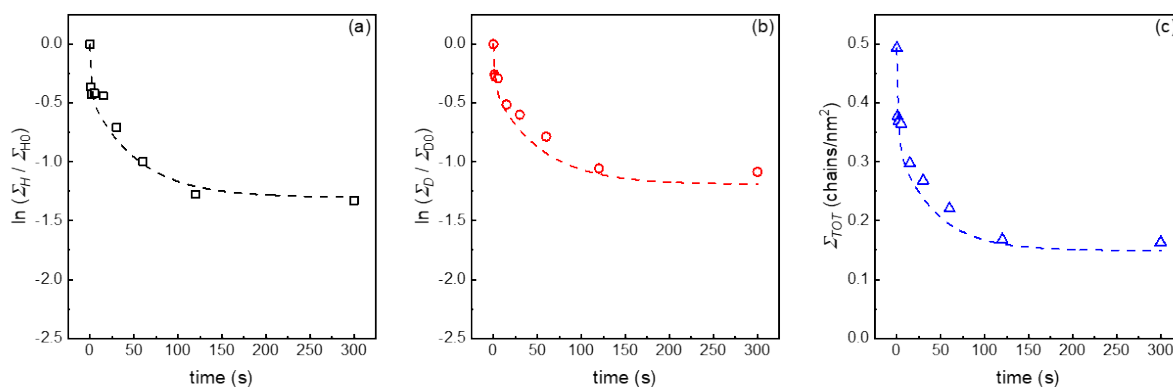

**Figure S7.**  $\ln(\Sigma_H/\Sigma_{H,0})$  (a),  $\ln(\Sigma_D/\Sigma_{D,0})$  (b) and  $\Sigma_{TOT}$  (c) vs degrafting time for Brush90. The experimental data are reported as black, red and blue dots, respectively, while the data fitting was performed with the software Origin using a double factor exponential decay function.

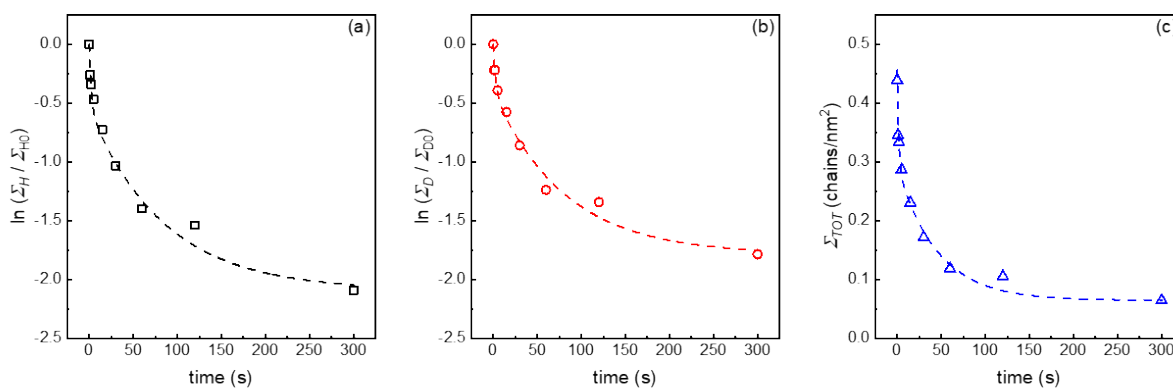

**Figure S8.**  $\ln(\Sigma_H/\Sigma_{H,0})$  (a),  $\ln(\Sigma_D/\Sigma_{D,0})$  (b) and  $\Sigma_{TOT}$  (c) vs degrafting time for Brush50. The experimental data are reported as black, red and blue dots, respectively, while the data fitting was performed with the software Origin using a double factor exponential decay function.

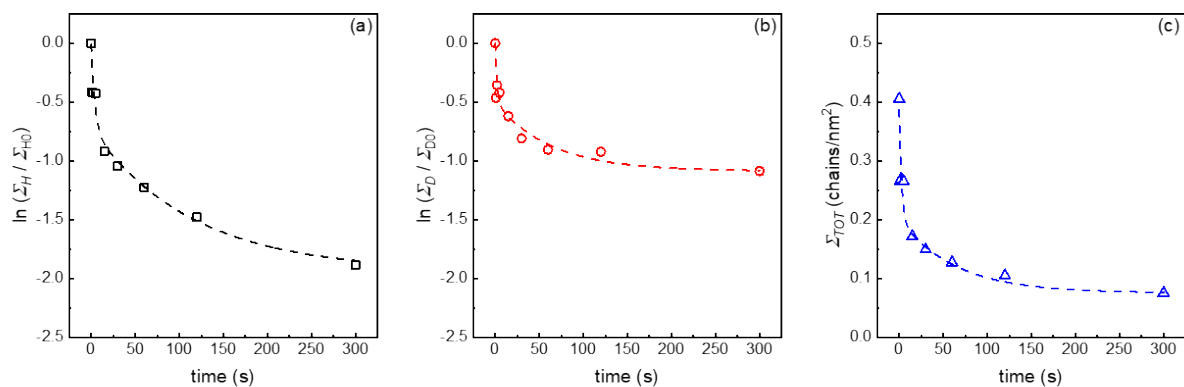

**Figure S9.**  $\ln(\Sigma_H/\Sigma_{H,0})$  (a),  $\ln(\Sigma_D/\Sigma_{D,0})$  (b) and  $\Sigma_{TOT}$  (c) vs degrafting time for Brush20. The experimental data are reported as black, red and blue dots, respectively, while the data fitting was performed with the software Origin using a double factor exponential decay function.

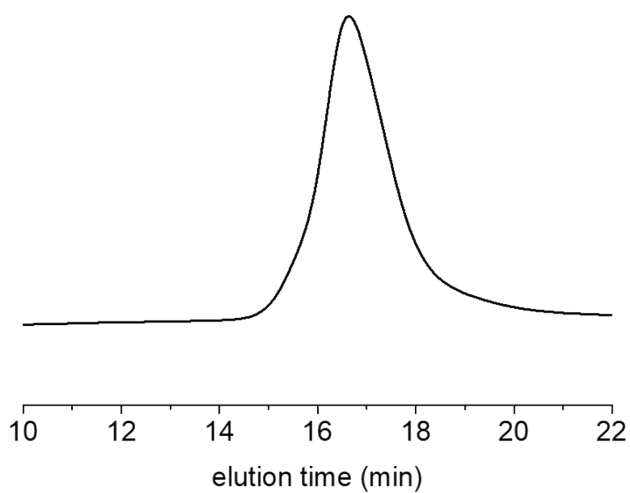

**Figure S10.** SEC chromatogram of the PS43.2-OH sample.
